# Supplementary material
Source: PubMed Central journal article supplement (PMC2853283)

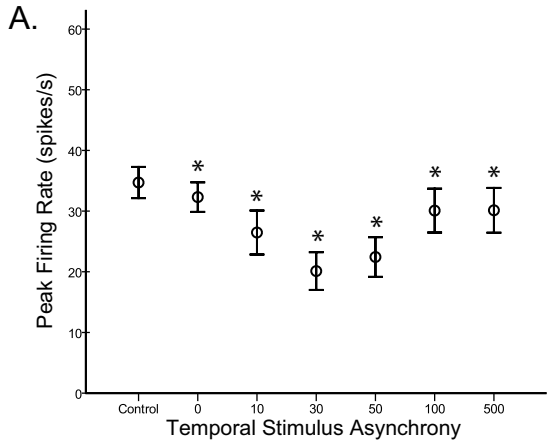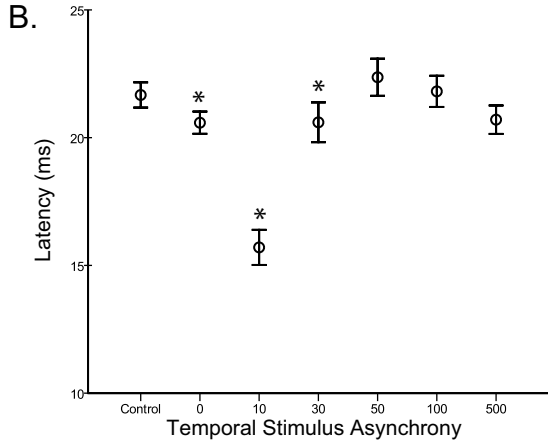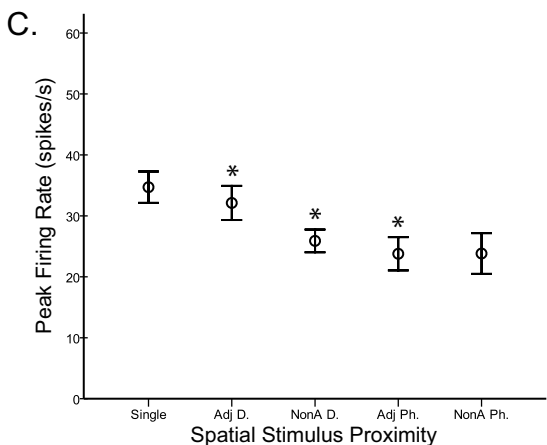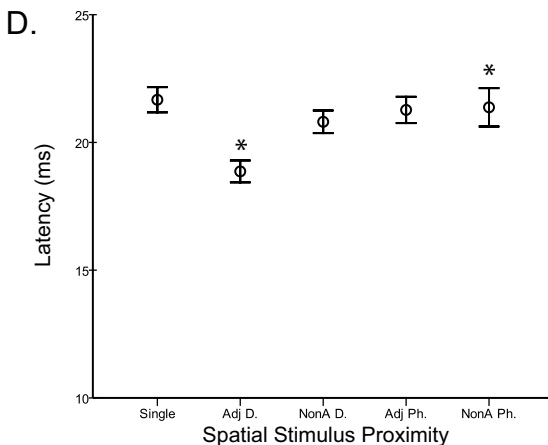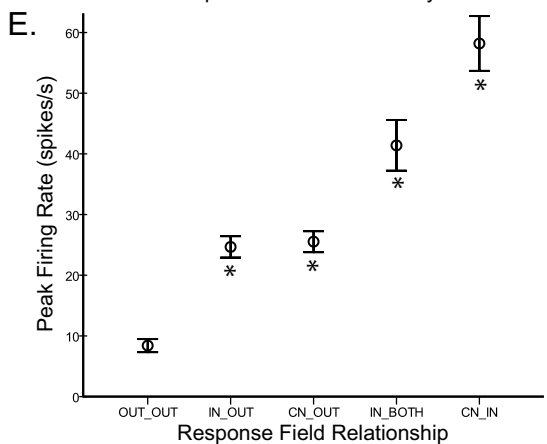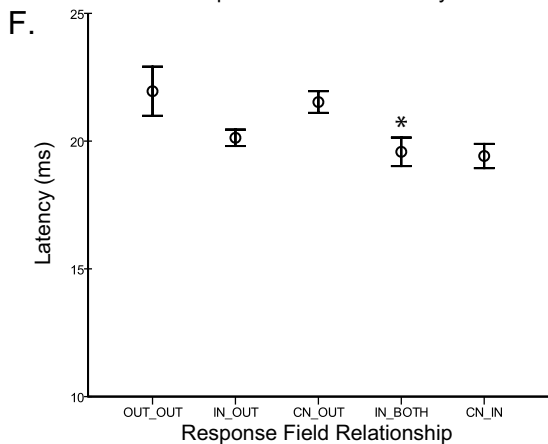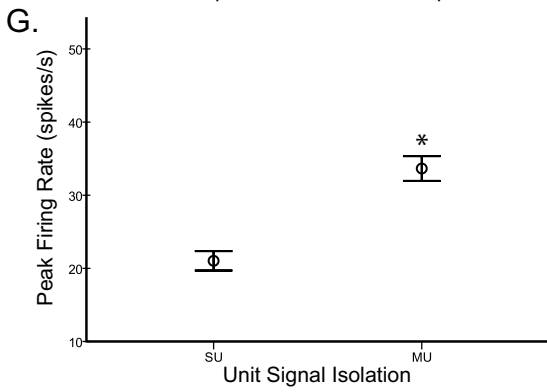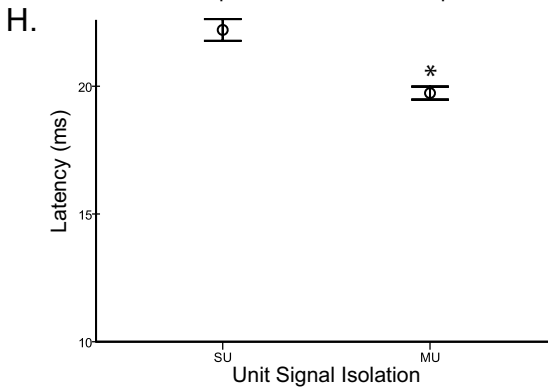

Supplement: figS2.pdf [file figS2.pdf]

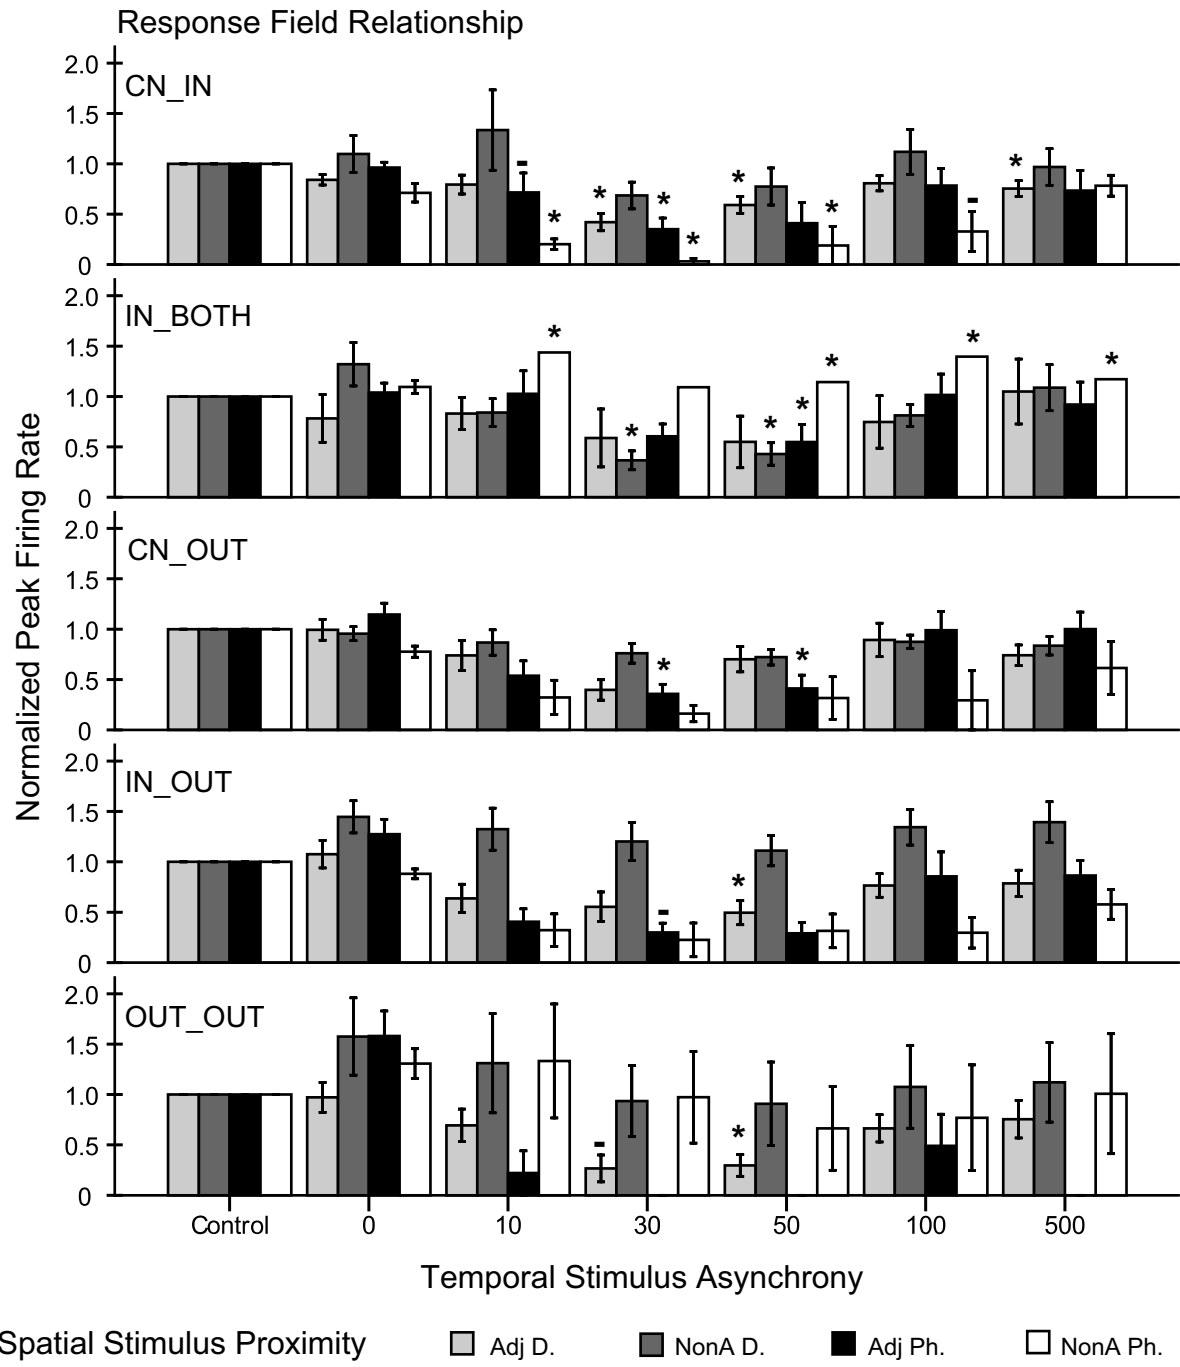

Supplement: figS3.pdf [file figS3.pdf]

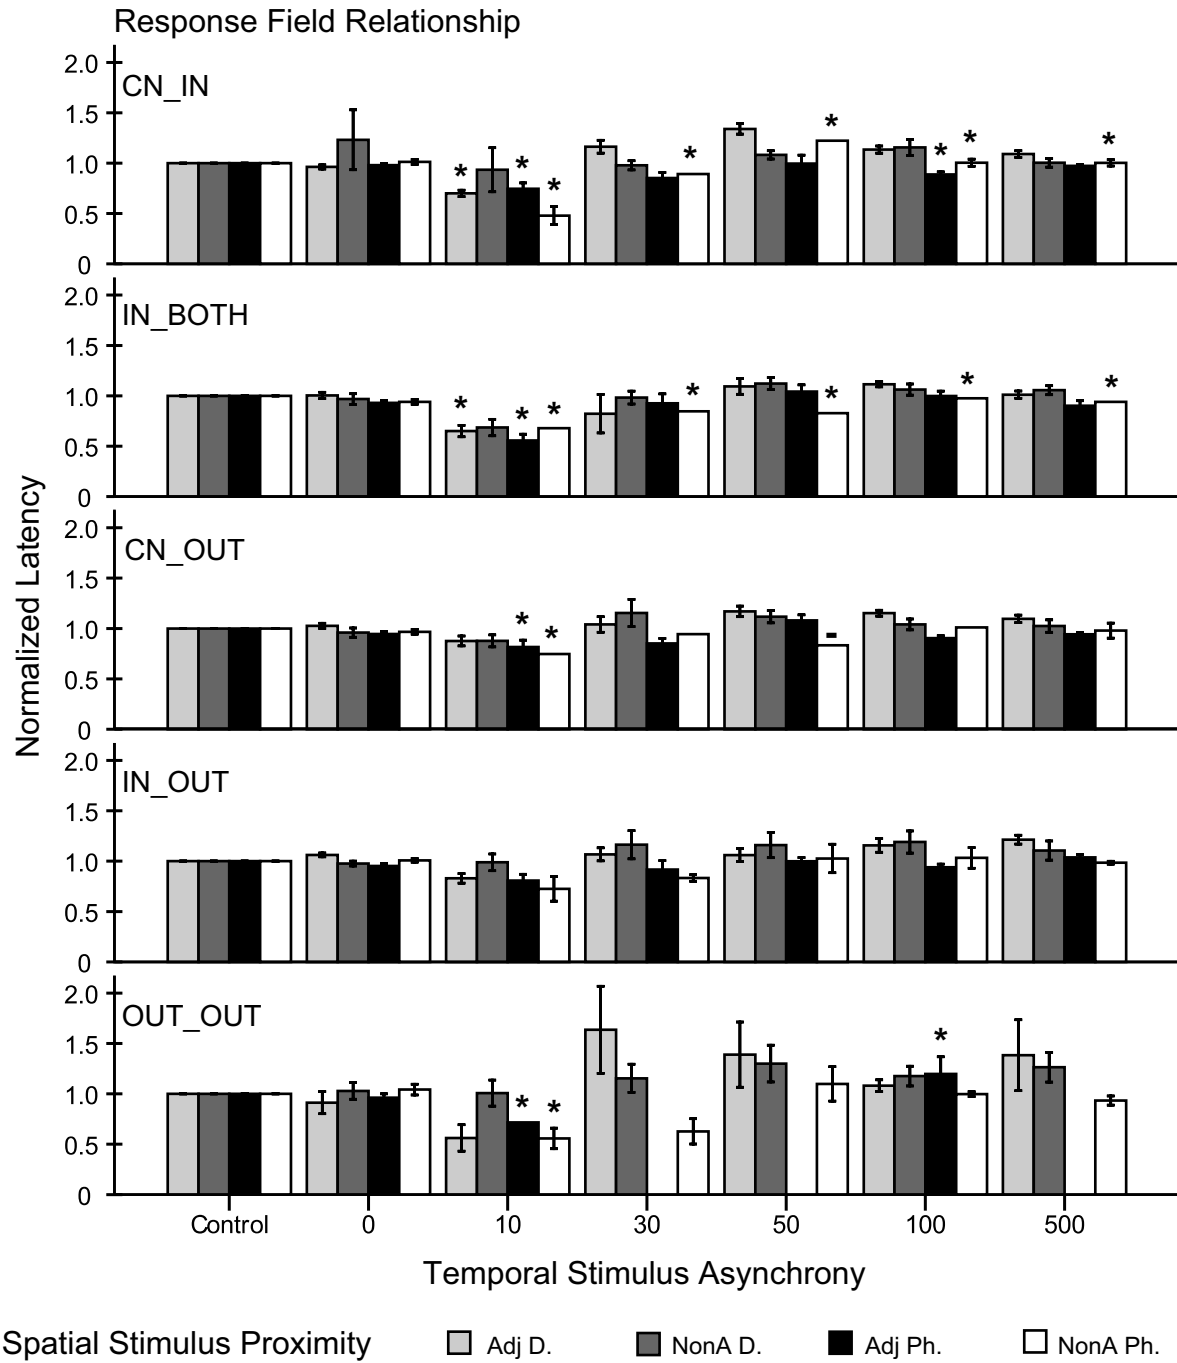

Supplement: figS4.pdf [file figS4.pdf]
